# Supplementary material for: Direct patterning of liquid materials on flat and curved substrates using flexible molds with through-hole and post arrays
Source: Royal Society of Chemistry journal article supplement (doi:10.1039/d4ra05252h), 2024-01-01
Supplement: d4ra05252h1.pdf [file d4ra05252h1.pdf]

*Supplementary Information*

**Direct Patterning of Liquid Materials on Flat and Curved  
Substrates Using Flexible Molds with Through-hole and Post  
Arrays**

*Youngchul Chae<sup>1</sup>, Juyeol Bae<sup>2</sup>, and Taesung Kim<sup>1,3\*</sup>*

<sup>1</sup>Department of Mechanical Engineering, Ulsan National Institute of Science and Technology (UNIST), 50 UNIST-gil, Ulsan 44919, Republic of Korea.

<sup>2</sup>School of Mechanical Engineering, Chonnam National University, 77 Yongbong-ro, Buk-gu, Gwangju 61186, Republic of Korea.

<sup>3</sup>Department of Biomedical Engineering, Ulsan National Institute of Science and Technology (UNIST), 50 UNIST-gil, Ulsan 44919, Republic of Korea.

**\*Correspondence**

Taesung Kim

Department of Mechanical Engineering

Ulsan National Institute of Science and Technology (UNIST)

50 UNIST-gil, Ulsan 44919, Republic of Korea

E-mail: [tskim@unist.ac.kr](mailto:tskim@unist.ac.kr)

Tel: +82-52-217-2313

Fax: +82-52-217-2409

## Supplementary Figures

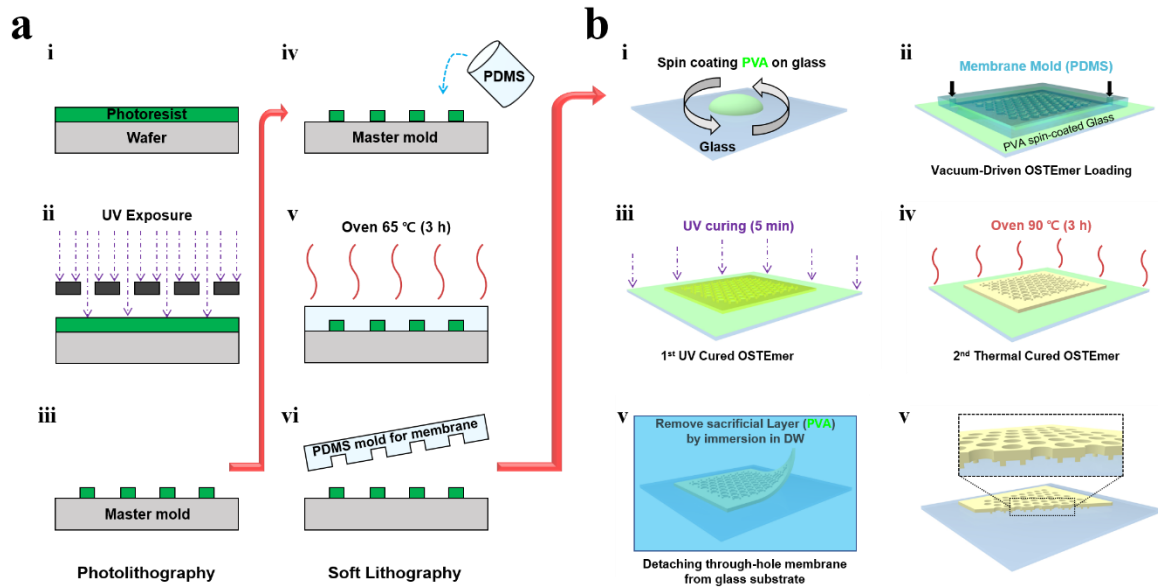

**Figure S1. Fabrication process of the microfluidic platform featuring through-hole and post arrays. (a)** Schematic of the photolithography process used to fabricate the SU-8 master mold and the subsequent soft lithography process for producing a PDMS mold. **(b)** Schematic of the fabrication of an OSTEMER membrane with through-hole and post arrays using the PDMS mold.

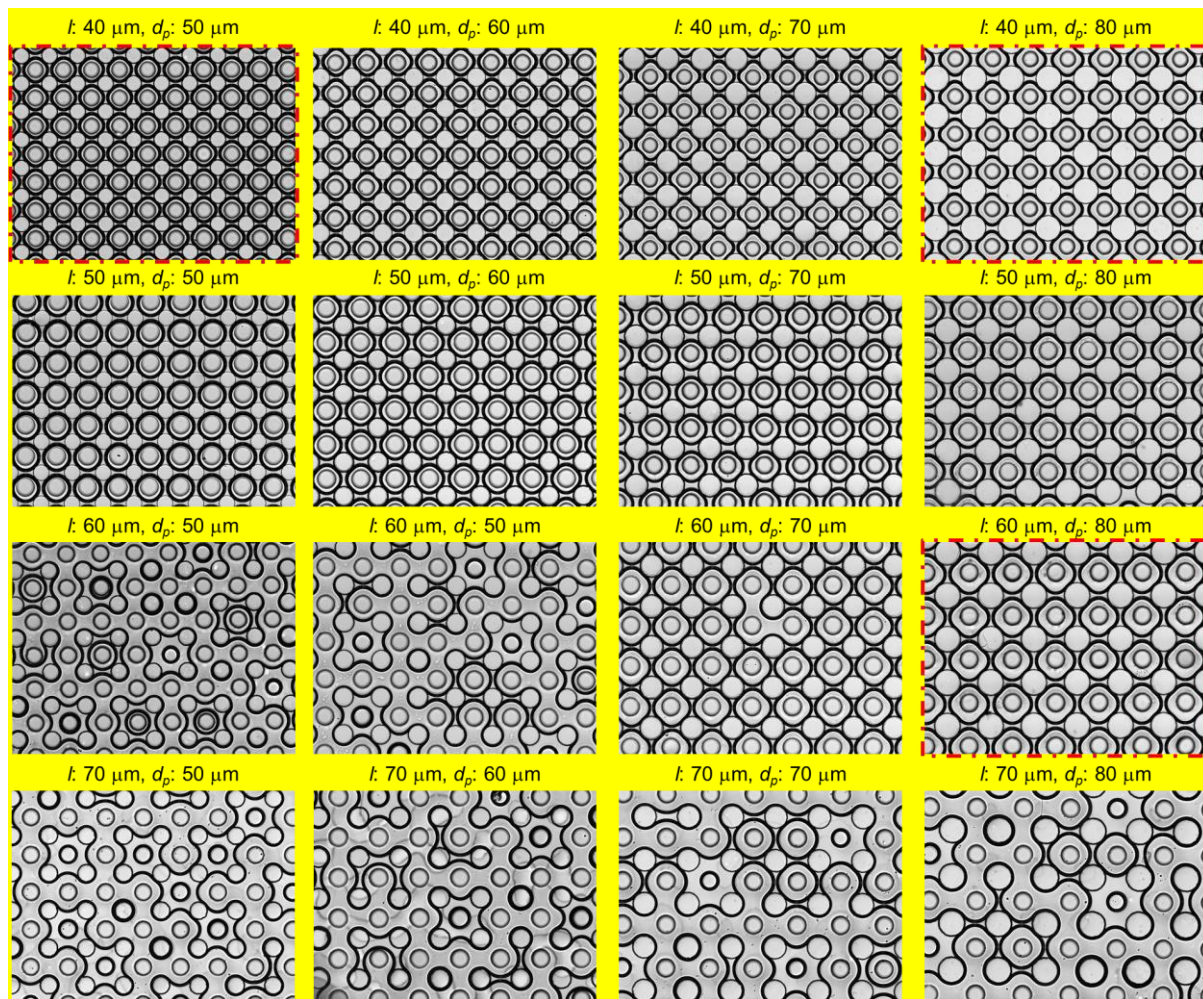

**Figure S2. Characterization of defects in oil films patterned by varying the parameters of the square array of through-holes and posts.** The diameter of the posts is  $d_p$ , and the distance between posts is  $l$ . The images marked in red dashed rectangles correspond to the case shown in Fig. 4c.

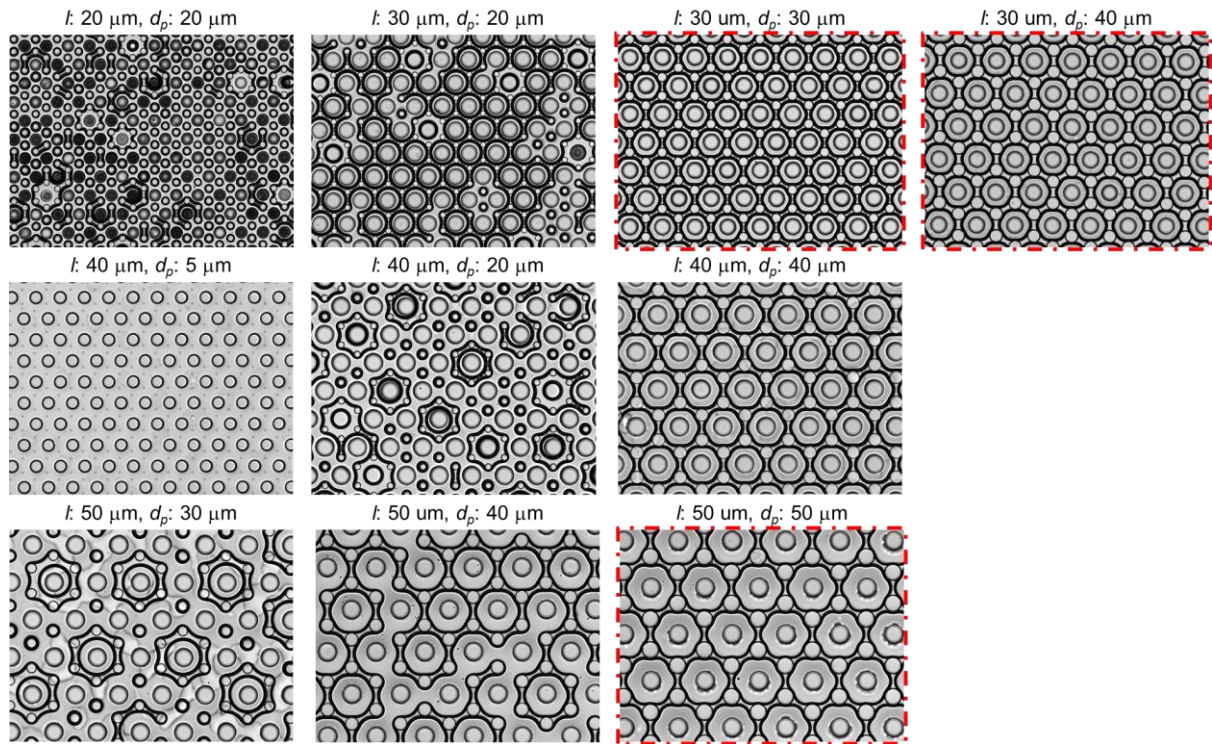

**Figure S3. Characterization of defects in oil films patterned by varying the parameters of the hexagonal array of through-holes and posts.** The diameter of the posts is  $d_p$ , and the distance between posts is  $l$ . The images marked in red rectangles correspond to the case shown in Fig. 4f.

- End of document -
